# Supplementary material
Source: Springer Nature journal article supplement (https://www.springermedizin.de/resource/supplementary/13041_2013_221_MOESM12_ESM.pdf/25657772)

A

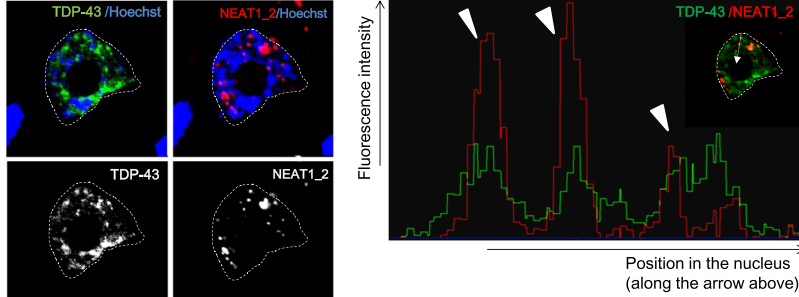

B

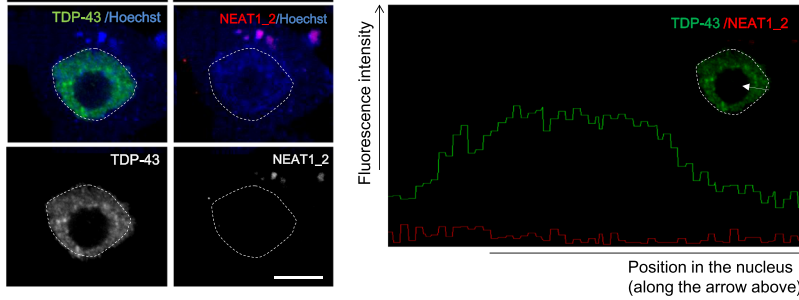

C

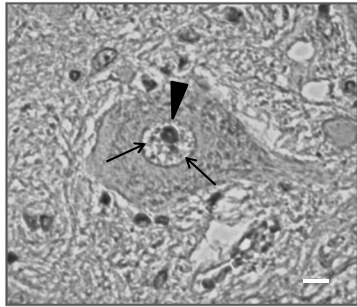

ALS case

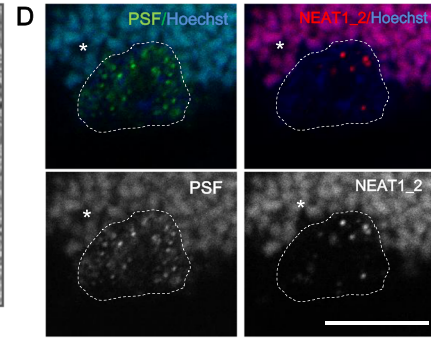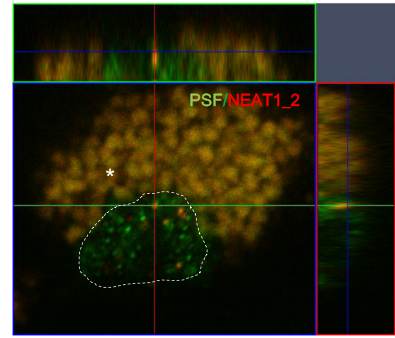

E

ALS case

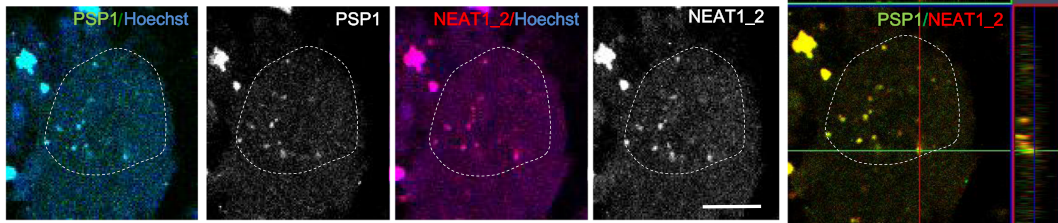

ALS case

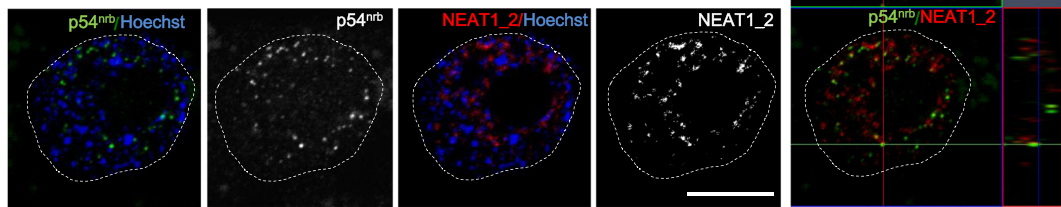

Supplement: MOESM12 [file 25657772]
